# Supplementary figures and images for: Effects of molting on the visual acuity of the blue crab,Callinectes sapidus
Source: Oxford University Press journal article supplement (doi:10.1242/jeb.056861), 2011-08-24

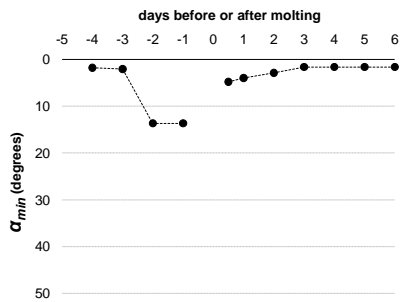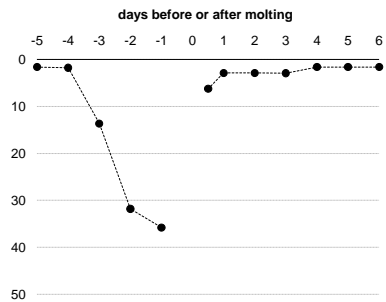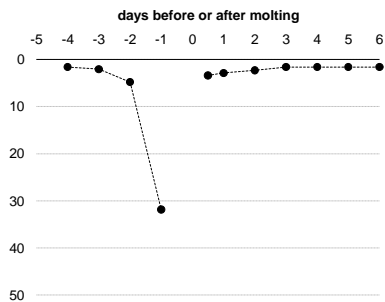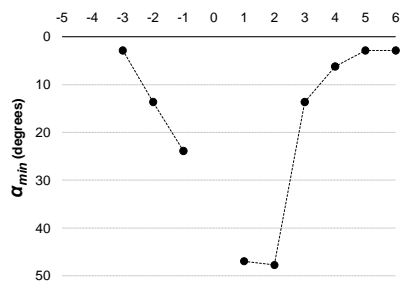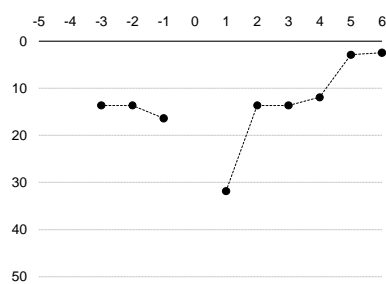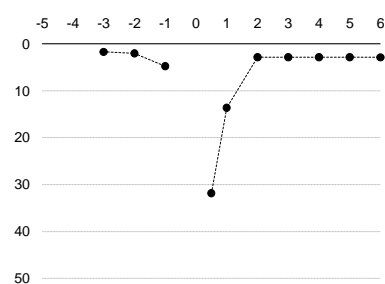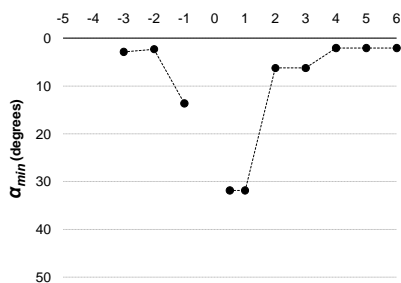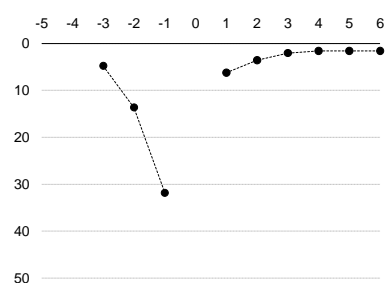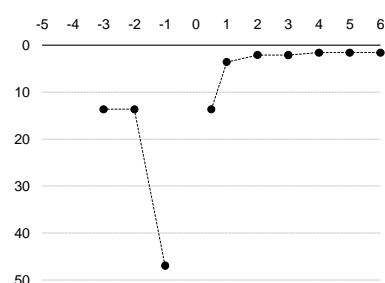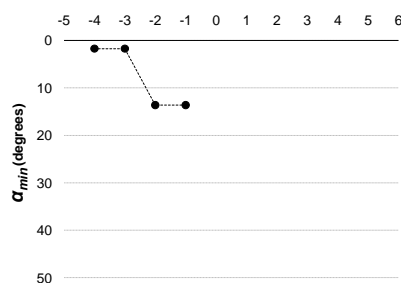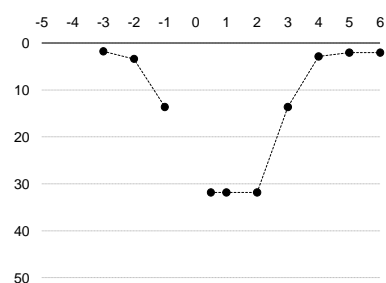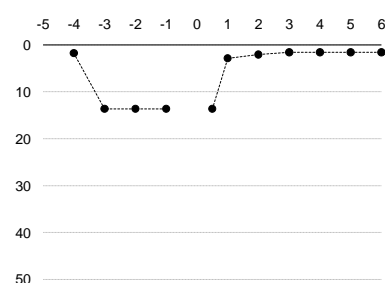

Supplement: jeb056861figs1.pdf [file jeb056861figs1.pdf]
